# Supplementary material for: New Metrics for Evaluating Viral Respiratory Pathogenesis
Source: PLOS journal article supplement (doi:10.1371/journal.pone.0131451), 2015-06-26
Supplement: S3 (10.1371/journal.pone.0131451.s003) [file journal.pone.0131451.s003]

**Supporting Information Table S3: Weight loss following IAV and Mock infection**

| Cage/Mouse # |     | Virus | Day 0 | Day 1 | Day 2 | Day 3 | Day 4 | Day 5 | Day 6 | Day 7 | Day 8 | Day 9 | Day 10 | Day 11 | Day 12 | Day 13 | Day 14 | Day 15 | Day 16 | Day 17 |
|--------------|-----|-------|-------|-------|-------|-------|-------|-------|-------|-------|-------|-------|--------|--------|--------|--------|--------|--------|--------|--------|
| Flu          | L-1 | IAV   | 20.6  | 18.9  | 19.6  | 19.1  | 17.1  | 17.1  | 16.7  | 15.6  | 14.9  | 15    | 15.4   | 16.3   | 17.6   | 18.6   | 18.5   | 18.7   | 19.5   | 19.7   |
| Flu          | L-2 | IAV   | 22.3  | 21.5  | 22.3  | 20.9  | 19.2  | 19.2  | 18.3  | 17.2  | 16.3  | 16.3  | 16.4   | 16.1   | 16.7   | 16.8   | 17.4   | 18     | 18.3   | 18.5   |
| Flu          | L-3 | IAV   | 26.0  | 24.2  | 25    | 24.9  | 23.1  | 23.1  | 22.2  | 20.6  | 19.2  | 18.7  | 18.9   | 20.4   | 21.8   | 22.4   | 23.1   | 23.3   | 24     | 23.2   |
| Flu          | L-4 | IAV   | 20.5  | 20.4  | 21.5  | 20.5  | 19.1  | 19.1  | 18.3  | 16.9  | 15.8  | 15.1  | Euth   |        |        |        |        |        |        |        |
|              |     |       |       |       |       |       |       |       |       |       |       |       |        |        |        |        |        |        |        |        |
| Mock         | L-5 | PBS   | 21    | 20.6  | 21    | 20.8  | 21.2  | 21.2  | 21.3  | 20.6  | 20.8  | 20.8  | 20.9   | 21.2   | 20.7   | 21     | 21     | 21.4   | 21.1   | 21.4   |
| Mock         | L-6 | PBS   | 21.4  | 21.1  | 21.6  | 21.3  | 21.9  | 21.9  | 22    | 21.9  | 21.9  | 22    | 21.6   | 21.7   | 22     | 22.3   | 22.1   | 22     | 21.8   | 21.9   |
| Mock         | L-7 | PBS   | 19.8  | 20.2  | 20.7  | 20.4  | 20.8  | 20.8  | 21.2  | 20.5  | 20.4  | 20.7  | 21.1   | 21.2   | 20.8   | 21.4   | 21.5   | 21.8   | 20.7   | 20.7   |

Weight loss values (grams) following infection with Influenza A Virus (IAV) or Mock (PBS). As per animal protocol, all mice were weighed over the first seven days following infection and each subsequent day until mice succumb to infection, regained their Day 0 starting body weight, or had weight gain on 4 consecutive days. Mice losing greater than 20% body weight were ground fed and monitored multiple times per day. Mice losing >30% body weight or determined to be moribund/unlikely to recover were immediately sacrificed using humane euthanasia protocols.
