# Supplementary material for: New Metrics for Evaluating Viral Respiratory Pathogenesis
Source: PLOS journal article supplement (doi:10.1371/journal.pone.0131451), 2015-06-26
Supplement: S5 (10.1371/journal.pone.0131451.s005) [file journal.pone.0131451.s005]

**Supporting Information Table S5: Significant Differences in Respiratory Function in specific virus infection**

| Phenotype                | Differences       | Timepoints               |
|--------------------------|-------------------|--------------------------|
| Sqrt(Freq)               | Infected vs. Mock | D2, D7                   |
|                          | SARS vs. Flu      | D7                       |
| Log <sub>10</sub> (TVb)  | Infected vs. Mock | D3, D4, D7               |
|                          | SARS vs. Flu      | D3                       |
| Log <sub>10</sub> (MVb)  | Infected vs. Mock | D7                       |
|                          | SARS vs. Flu      | N/A                      |
| Log <sub>10</sub> (Penh) | Infected vs. Mock | D2-D4, D7, D10, D28      |
|                          | SARS vs. Flu      | D2, D7, D10              |
| LN(Rpef)                 | Infected vs. Mock | D2-D4, D7, D10, D14, D21 |
|                          | SARS vs. Flu      | D7                       |
| Sqrt(PIF)                | Infected vs. Mock | D3, D4                   |
|                          | SARS vs. Flu      | D3, D4                   |
| Sqrt(PEF)                | Infected vs. Mock | D3, D4, D7               |
|                          | SARS vs. Flu      | N/A                      |
| 1/Ti                     | Infected vs. Mock | D2, D7                   |
|                          | SARS vs. Flu      | D2, D7                   |
| Log <sub>10</sub> (Te)   | Infected vs. Mock | D7                       |
|                          | SARS vs. Flu      | D7                       |
| Sqrt(EF50)               | Infected vs. Mock | D3, D7                   |
|                          | SARS vs. Flu      | N/A                      |
| 1/Tr                     | Infected vs. Mock | D3                       |
|                          | SARS vs. Flu      | N/A                      |

For each phenotype at each day, a partial F-test was used to identify those days on which treatment had a significant effect on respiratory phenotypes. We then used Tukey's HSD to identify whether those significant effects of treatment were due to respiratory differences between mock and infected animals, or between the different dose categories. Phenotypes: Freq=frequency, TVb=Tidal Volume, MBv=Minute Volume, penH=Enhanced Pause, rPEF=ratio of time to peak expiratory flow, PIFb=peak inspiration, PEFb=peak expiration, Ti=inspiratory time (milliseconds), Te=expiratory time (milliseconds), EF50=Mid-tidal expiratory flow, Tr=relaxation time
